# Supplementary material
Source: PubMed Central journal article supplement (PMC1810016)
Supplement: 15252989supp.pdf [file 15252989supp.pdf]

This is an electronic appendix to the Biology Letter by Jarošík et al. 2004 A general rule for the dependence of developmental rate on temperature in ectothermic animals. *Proc. R. Soc. Lond. B (Suppl.)* **271**, S219–S221. (DOI 10.1098/rsbl.2003.0145.)

Electronic appendices are refereed with the text. However, no attempt has been made to impose a uniform editorial style on the electronic appendices.

Table 2. Data for the populations studied, divided by taxonomic group, with source references, stages evaluated for each population of a species, number and range of temperatures used in each analysis, results of each ANCOVA test (P-value, intercept and slope  $\pm$  standard error SE for each stage evaluated), and violation of proportionality per °C in percentages (violations are calculated before rounding the values for the slopes to two decimal places). All the data for each particular stage evaluated fell within the range of the linear relationship between the rate of development and temperature. Bold indicates significant violation of null hypothesis on developmental proportionality, i.e. the hypothesis on a zero regression slope of proportional development on temperature. Because the regression slope corresponding to a violation of proportionality is unknown, test power is calculated for each data conforming to the null hypothesis, assuming that the observed regression slope violates of proportionality. This results in the observed regression slopes conforming to the null hypothesis being extremely small, which makes it difficult to assess whether the insignificant results are because the test is too weak.

#### **Data References**

Berman, D. I., Gorgolyik, S. I. & Neyfakh, A. A. 1987 Dependence of the rate of embryogenesis on temperature in newts *Hynobius keyserlingii* and *Triturus vulgaris*. *Ontogenez* **18**, 247-256 (in Russian).

- Dettlaff, T. A. 1985 Adaptation of poikilothermic animals to development under conditions of fluctuating temperatures and the problem of the integrity of the developing organism. *Ontogenez* **12**, 147-152 (in Russian).
- Dettlaff, T. A. & Ginzburg, A. S. 1954 *Embryonal development in sturgeon fishes (serjuga, sturgeon, and beluga) in the context of their husbandry*. Moscow: Izdatelstvo Akademii nauk SSSR (in Russian).
- Dettlaff, T. A. & Rudneva, T. 1973 Dimensionless characteristics of developmental duration in *Xenopus laevis*. *Ontogenez* **4**, 461-471 (in Russian).
- Grainger, J. N. R. 1959 The effect of constant and varying temperatures on the developing eggs of *Rana temporaria* L. *Zool. Anzeiger* **163**, 267-277.
- Hertwig, O. 1898 Ueber den Einfluss der Temperatur auf die Entwicklung von *Rana fusca* und *Rana esculenta*. *Archiv für Mikroskopische Anatomie* **51**, 319-381.
- Ignatieva, G. M. 1970 Regularities of the early embryogenesis of Salmonidae, as revealed by the method of dimensionless characteristics of developmental duration. *Ontogenez* **1**, 27-41 (in Russian).
- Ignatieva, G. M. 1974 Relative duration of the same periods of early embryogenesis in teleosts. *Ontogenez* **4**, 427-436 (in Russian).
- Kimmel, C. B., Ballard, W. W., Kimmel, S. R., Ullmann, B. & Schilling, T. F. 1995 Stages of embryonic development of the zebrafish. *Developmental Dynamics* **203**, 253-310.
- Mesczerjakov, V. N. 1975 Sludge worm *Tubifex tubifex*. In *Subjects in developmental biology* (ed. T. A. Dettlaff), pp. 31-52. Moscow: Nauka (in Russian).
- Moore, J. A. 1939 Temperature tolerance and rates of development in the eggs of Amphibia. *Ecology* **20**, 459-478.

Pawłowska-Indyk, A. 1980 Effect of temperature on the embryonic development of  
*Bombina variegata*. *Zoologica Poloniae* **27**, 397-407.

Peňáz, M., Prokeš, M., Kouřil, J. & Hamáčková, J. 1989 Influence of water temperature on  
the early development and growth of the tench, *Tinca tinca*. *Folia Zool.* **38**, 275-  
287.

Stephens, R. S. 1972 Studies on the development of the sea urchin *Strongylocentrotus*  
*droebachiensis*. I. Ecology and normal development. *Biol. Bull.* **142**,132-144.

| Taxonomic group:<br>Species         | Reference                 | Temp. (°C)<br>#1 | Range     | Stage                                                                                                                                                                                                                               | Intercept                    |                 |          | P     | Test Power | Violation<br>(% per °C) |
|-------------------------------------|---------------------------|------------------|-----------|-------------------------------------------------------------------------------------------------------------------------------------------------------------------------------------------------------------------------------------|------------------------------|-----------------|----------|-------|------------|-------------------------|
|                                     |                           |                  |           |                                                                                                                                                                                                                                     | (angular<br>transformations) | Slope±SE        |          |       |            |                         |
| <b>Osteichthyes: Teleostei</b>      |                           |                  |           |                                                                                                                                                                                                                                     |                              |                 |          |       |            |                         |
| <i>Cyprinus carpio</i> L.           | Ignatieva (1974)          | 6                | 12-26     | duration of the first cleavage division<br>beginning of gastrulation<br>yolk covered<br>10 somites                                                                                                                                  | 0.13                         | 0.00047±0.0014  | 0.003547 | -     | 7.52E-05   |                         |
|                                     |                           |                  |           |                                                                                                                                                                                                                                     | 0.51                         | 0.0052±0.0014   |          |       | 1.36E-03   |                         |
|                                     |                           |                  |           |                                                                                                                                                                                                                                     | 0.72                         | -0.0049±0.0014  |          |       | 3.75E-03   |                         |
| <i>Misgurnus fossilis</i> L.        | Ignatieva (1974)          | 5                | 12-23.5   | duration of the first cleavage division<br>beginning of gastrulation<br>yolk covered<br>10 somites                                                                                                                                  | 0.60                         | -0.00035±0.0014 | 0.005484 | -     | 1.34E-02   |                         |
|                                     |                           |                  |           |                                                                                                                                                                                                                                     | 0.12                         | 0.00087±0.0027  |          |       | 5.35E-05   |                         |
|                                     |                           |                  |           |                                                                                                                                                                                                                                     | 0.58                         | 0.0037±0.0027   |          |       | 4.53E-04   |                         |
| <i>Esox lucius</i> L.               | Ignatieva (1974)          | 6                | 4.1-18    | duration of the first cleavage division<br>beginning of gastrulation<br>yolk covered<br>10 somites                                                                                                                                  | 0.70                         | -0.012±0.0027   | 0.640792 | 0.105 | 8.17E-05   |                         |
|                                     |                           |                  |           |                                                                                                                                                                                                                                     | 0.12                         | 0.00073±0.0018  |          | 0.353 | 5.35E-05   |                         |
|                                     |                           |                  |           |                                                                                                                                                                                                                                     | 0.70                         | 0.0021±0.0018   |          | 0.256 | 4.53E-04   |                         |
|                                     |                           |                  |           |                                                                                                                                                                                                                                     | 0.74                         | -0.0017±0.0018  |          | 0.124 | 2.95E-04   |                         |
|                                     |                           |                  |           |                                                                                                                                                                                                                                     | 0.33                         | -0.00090±0.0018 |          | 0.055 | 8.17E-05   |                         |
| <i>Coregonus peled</i> (Gmelin)     | Ignatieva (1974)          | 3                | 2.5-4.8   | duration of the first cleavage division<br>beginning of gastrulation<br>yolk covered<br>10 somites                                                                                                                                  | 0.13                         | -0.0011±0.0020  | 0.929457 | 0.072 | 1.30E-04   |                         |
|                                     |                           |                  |           |                                                                                                                                                                                                                                     | 0.70                         | -0.0048±0.0020  |          | 0.136 | 2.28E-03   |                         |
|                                     |                           |                  |           |                                                                                                                                                                                                                                     | 0.63                         | 0.013±0.0020    |          | 0.116 | 1.76E-02   |                         |
|                                     |                           |                  |           |                                                                                                                                                                                                                                     | 0.48                         | -0.011±0.0020   |          | 0.407 | 1.22E-02   |                         |
| <i>Salmo gairdneri</i> Richardson   | Ignatieva (1970)          | 8                | 4.8-15    | duration of the first cleavage division<br>beginning of gastrulation<br>yolk covered<br>10 somites                                                                                                                                  | 0.42                         | -0.0013±0.0011  | 0.756405 | 0.157 | 1.63E-04   |                         |
|                                     |                           |                  |           |                                                                                                                                                                                                                                     | 0.48                         | 0.00063±0.0011  |          | 0.078 | 3.96E-05   |                         |
|                                     |                           |                  |           |                                                                                                                                                                                                                                     | 0.56                         | 0.00023±0.0011  |          | 0.070 | 5.52E-06   |                         |
| <i>Tinca tinca</i> L.               | Periáz et al. (1989)      | 5                | 17.5-27.5 | duration of the first cleavage division<br>4 blastomeres<br>10 somites                                                                                                                                                              | 0.05                         | -0.00018±0.0017 | 0.000006 | -     | 3.09E-06   |                         |
|                                     |                           |                  |           |                                                                                                                                                                                                                                     | 0.06                         | 0.00035±0.0017  |          |       | 1.25E-05   |                         |
|                                     |                           |                  |           |                                                                                                                                                                                                                                     | 0.33                         | 0.0011±0.0017   |          |       | 1.25E-04   |                         |
|                                     |                           |                  |           |                                                                                                                                                                                                                                     | 0.01                         | 0.0039±0.0017   |          |       | 1.53E-03   |                         |
|                                     |                           |                  |           |                                                                                                                                                                                                                                     | 0.48                         | -0.0028±0.0017  |          |       | 7.78E-04   |                         |
|                                     |                           |                  |           |                                                                                                                                                                                                                                     | 0.81                         | -0.029±0.0037   |          |       | 8.28E-02   |                         |
|                                     |                           |                  |           |                                                                                                                                                                                                                                     | 0.73                         | 0.012±0.0023    |          |       | 1.37E-02   |                         |
| <i>Brachydanio rerio</i> (Hamilton) | Kimmel et al. (1995)      | 3                | 25-33     | onset of exogenous feeding<br>8 cells<br>64 cells<br>1000 cells<br>dome<br>shield<br>75% epiboly<br>bud<br>1-somite<br>14-somite<br>20-somite<br>prim5<br>prim-15<br>prim-24<br>high bud<br>long bud<br>pec-fin<br>protruding mouth | 0.18                         | -0.0019±0.0050  | 0.023830 | -     | 3.45E-04   |                         |
|                                     |                           |                  |           |                                                                                                                                                                                                                                     | 0.00                         | 0.0038±0.0050   |          |       | 1.47E-03   |                         |
|                                     |                           |                  |           |                                                                                                                                                                                                                                     | 0.13                         | -0.00069±0.0050 |          |       | 4.74E-05   |                         |
|                                     |                           |                  |           |                                                                                                                                                                                                                                     | 0.24                         | -0.0028±0.0050  |          |       | 7.87E-04   |                         |
|                                     |                           |                  |           |                                                                                                                                                                                                                                     | 0.27                         | -0.0045±0.0050  |          |       | 2.04E-03   |                         |
|                                     |                           |                  |           |                                                                                                                                                                                                                                     | 0.02                         | 0.0045±0.0050   |          |       | 2.04E-03   |                         |
|                                     |                           |                  |           |                                                                                                                                                                                                                                     | 0.25                         | -0.0038±0.0050  |          |       | 1.43E-03   |                         |
|                                     |                           |                  |           |                                                                                                                                                                                                                                     | 0.36                         | -0.0090±0.0050  |          |       | 8.19E-03   |                         |
|                                     |                           |                  |           |                                                                                                                                                                                                                                     | 0.33                         | -0.0026±0.0050  |          |       | 7.01E-04   |                         |
|                                     |                           |                  |           |                                                                                                                                                                                                                                     | 0.35                         | -0.0052±0.0050  |          |       | 2.75E-03   |                         |
|                                     |                           |                  |           |                                                                                                                                                                                                                                     | 0.14                         | 0.0036±0.0050   |          |       | 1.30E-03   |                         |
|                                     |                           |                  |           |                                                                                                                                                                                                                                     | 1.08                         | -0.027±0.0050   |          |       | 7.59E-02   |                         |
|                                     |                           |                  |           |                                                                                                                                                                                                                                     | 0.24                         | 0.0013±0.0050   |          |       | 1.75E-04   |                         |
|                                     |                           |                  |           |                                                                                                                                                                                                                                     | 0.17                         | 0.0053±0.0050   |          |       | 2.86E-03   |                         |
|                                     |                           |                  |           |                                                                                                                                                                                                                                     | 0.10                         | 0.0087±0.0050   |          |       | 7.59E-03   |                         |
|                                     |                           |                  |           |                                                                                                                                                                                                                                     | 0.21                         | 0.0066±0.0050   |          |       | 4.38E-03   |                         |
|                                     |                           |                  |           |                                                                                                                                                                                                                                     | 0.21                         | 0.0072±0.0050   |          |       | 5.14E-03   |                         |
| <b>Osteichthyes: Chondrostei</b>    |                           |                  |           |                                                                                                                                                                                                                                     |                              |                 |          |       |            |                         |
| <i>Acipenser stellatus</i> Pallas   | Detlaff & Ginzburg (1954) | 5                | 15.4-22.1 | beginning of gastrulation<br>horseshoe-shaped blastoporus<br>closure of neural canal<br>occurrence of tail bud<br>tail touches head                                                                                                 | 0.43                         | 0.0024±0.0050   | 0.751113 | 0.120 | 5.70E-04   |                         |
|                                     |                           |                  |           |                                                                                                                                                                                                                                     | 0.34                         | 0.0056±0.0052   |          | 0.334 | 3.19E-03   |                         |
|                                     |                           |                  |           |                                                                                                                                                                                                                                     | 0.33                         | -0.0040±0.0052  |          | 0.205 | 1.60E-03   |                         |
|                                     |                           |                  |           |                                                                                                                                                                                                                                     | 0.49                         | -0.0038±0.0052  |          | 0.190 | 1.42E-03   |                         |
|                                     |                           |                  |           |                                                                                                                                                                                                                                     | 0.69                         | -0.0016±0.0052  |          | 0.091 | 2.56E-04   |                         |

| Taxonomic group:<br>Species                            | Reference                 | Temp. (°C)<br>#1 | Stage<br>Range                                                                                                                                                  | Intercept                    |                 | P        | Test Power | Violation<br>(% per °C) |
|--------------------------------------------------------|---------------------------|------------------|-----------------------------------------------------------------------------------------------------------------------------------------------------------------|------------------------------|-----------------|----------|------------|-------------------------|
|                                                        |                           |                  |                                                                                                                                                                 | (angular<br>transformations) | Slope±SE        |          |            |                         |
| <i>Acipenser gusidenstaedti</i><br>Brandt              | Detlaff & Ginzburg (1954) | 7                | 11.8-24.4<br>beginning of gastrulation                                                                                                                          | 0.34                         | 0.0036±0.0070   | 0.445131 | 0.159      | 1.33E-03                |
| <i>Huso huso</i> L.                                    | Detlaff & Ginzburg (1954) | 3                | 9.8-15.2<br>beginning of gastrulation                                                                                                                           | 0.40                         | -0.00096±0.0070 | 0.156340 | 0.078      | 9.31E-05                |
|                                                        |                           |                  |                                                                                                                                                                 | 0.33                         | -0.0053±0.0070  |          | 0.235      | 2.79E-03                |
|                                                        |                           |                  |                                                                                                                                                                 | 0.18                         | 0.015±0.0070    |          | 0.179      | 2.38E-02                |
|                                                        |                           |                  |                                                                                                                                                                 | 0.28                         | 0.0025±0.0080   |          | 0.109      | 6.17E-04                |
|                                                        |                           |                  |                                                                                                                                                                 | 0.61                         | 0.0042±0.0080   |          | 0.162      | 1.77E-03                |
| <b>Amphibia: Anura</b><br><i>Xenopus laevis</i> Daudin | Detlaff & Rudneva (1973)  | 3                | 17-22<br>blastoporus                                                                                                                                            | 0.90                         | -0.0015±0.0064  | 0.998589 | 0.072      | 2.19E-04                |
|                                                        |                           |                  |                                                                                                                                                                 | 0.44                         | 0.00078±0.0064  |          | 0.060      | 6.04E-05                |
|                                                        |                           |                  |                                                                                                                                                                 | 0.31                         | 0.00043±0.0064  |          | 0.055      | 1.81E-05                |
| <i>Rana temporaria</i> L.                              | Detlaff (1985)            | 5                | 5-24<br>beginning of gastrulation                                                                                                                               | 0.33                         | 0.00084±0.0064  | 0.205086 | 0.061      | 7.13E-05                |
|                                                        |                           |                  |                                                                                                                                                                 | 0.70                         | 0.0027±0.0019   |          | 0.414      | 7.50E-04                |
|                                                        |                           |                  |                                                                                                                                                                 | 0.87                         | -0.0027±0.0019  |          | 0.414      | 7.50E-04                |
| <i>Rana temporaria</i> L.                              | Grainger (1959)           | 5                | 11-25<br>200 cells                                                                                                                                              | 0.08                         | 0.0037±0.0021   | 0.355177 | 0.841      | 1.39E-03                |
|                                                        |                           |                  |                                                                                                                                                                 | 0.19                         | 0.00035±0.0021  |          | 0.082      | 1.22E-05                |
|                                                        |                           |                  |                                                                                                                                                                 | 0.22                         | -0.0012±0.0021  |          | 0.170      | 1.39E-04                |
| <i>Bombina variegata</i> L.                            | Pawlowska-Indyk (1980)    | 6                | 12.4-27.9<br>late blastula                                                                                                                                      | 0.24                         | 0.00091±0.0021  | 0.003121 | 0.135      | 8.23E-05                |
|                                                        |                           |                  |                                                                                                                                                                 | 0.23                         | 0.0041±0.0021   |          | 0.985      | 1.70E-03                |
|                                                        |                           |                  |                                                                                                                                                                 | 0.48                         | -0.0025±0.0021  |          | 0.449      | 6.41E-04                |
|                                                        |                           |                  |                                                                                                                                                                 | 0.38                         | -0.0016±0.0021  |          | 0.219      | 2.25E-04                |
|                                                        |                           |                  |                                                                                                                                                                 | 0.74                         | -0.00059±0.0021 |          | 0.103      | 3.53E-05                |
|                                                        |                           |                  |                                                                                                                                                                 | -1.69                        | 0.019±0.015     |          | -          | 3.81E-02                |
|                                                        |                           |                  |                                                                                                                                                                 | -1.01                        | 0.015±0.015     |          | -          | 2.41E-02                |
|                                                        |                           |                  |                                                                                                                                                                 | 7.28                         | -0.065±0.015    |          | -          | 4.29E-01                |
|                                                        |                           |                  |                                                                                                                                                                 | -2.56                        | 0.031±0.015     |          | -          | 9.38E-02                |
|                                                        |                           |                  |                                                                                                                                                                 | 0.24                         | 0.014±0.0058    |          | 0.040280   | 1.97E-02                |
| <i>Rana sylvatica</i> Le Conte                         | Moore (1939)              | 3                | 10-18.5<br>development of <i>Rana sylvatica</i> . Anat. Rec. 68, 489-496 (1937)                                                                                 | 0.35                         | -0.0075±0.0058  | 0.994105 | 0.053      | 1.65E-05                |
|                                                        |                           |                  |                                                                                                                                                                 | 0.27                         | 0.00023±0.0058  |          | 0.087      | 1.40E-03                |
|                                                        |                           |                  |                                                                                                                                                                 | 0.28                         | 0.0010±0.0058   |          | 0.084      | 1.18E-03                |
|                                                        |                           |                  |                                                                                                                                                                 | 0.28                         | 0.0012±0.0058   |          | 0.102      | 2.34E-03                |
|                                                        |                           |                  |                                                                                                                                                                 | 0.58                         | -0.019±0.0058   |          | 0.105      | 2.54E-03                |
|                                                        |                           |                  |                                                                                                                                                                 | -0.11                        | 0.021±0.0058    |          | 0.110      | 2.83E-03                |
|                                                        |                           |                  |                                                                                                                                                                 | 0.47                         | -0.0038±0.0058  |          | 0.349      | 8.96E-03                |
|                                                        |                           |                  |                                                                                                                                                                 | 0.49                         | -0.0012±0.0058  |          | 0.052118   | 0.552118                |
|                                                        |                           |                  |                                                                                                                                                                 | 0.39                         | -0.0004±0.013   |          | 0.074      | 2.89E-04                |
|                                                        |                           |                  |                                                                                                                                                                 | 0.27                         | 0.0037±0.013    |          | 0.227      | 5.00E-03                |
|                                                        |                           |                  |                                                                                                                                                                 | 0.34                         | 0.0034±0.013    |          | 0.495      | 1.36E-02                |
|                                                        |                           |                  |                                                                                                                                                                 | 0.58                         | -0.0048±0.013   |          | 0.268      | 6.35E-03                |
|                                                        |                           |                  |                                                                                                                                                                 | 0.56                         | -0.0050±0.013   |          |            |                         |
| 0.30                                                   | 0.0053±0.013              |                  |                                                                                                                                                                 |                              |                 |          |            |                         |
| 0.49                                                   | -0.0095±0.0063            |                  |                                                                                                                                                                 |                              |                 |          |            |                         |
| <i>Rana pipiens</i> Schreber                           | Moore (1939)              | 4                | 15.6-26.7<br>13 (stages defined by Pollister, A. W., & Moore, J. A. Tables for the normal development of <i>Rana sylvatica</i> . Anat. Rec. 68, 489-496 (1937)) | 0.32                         | 0.0017±0.0063   | 0.552118 | 0.074      | 2.89E-04                |
|                                                        |                           |                  |                                                                                                                                                                 | 0.23                         | 0.0071±0.0063   |          | 0.227      | 5.00E-03                |
|                                                        |                           |                  |                                                                                                                                                                 | 0.18                         | 0.012±0.0063    |          | 0.495      | 1.36E-02                |
|                                                        |                           |                  |                                                                                                                                                                 | 0.73                         | -0.0080±0.0063  |          | 0.268      | 6.35E-03                |
|                                                        |                           |                  |                                                                                                                                                                 | 0.32                         | 0.0017±0.0063   |          |            |                         |
|                                                        |                           |                  |                                                                                                                                                                 | 0.23                         | 0.0071±0.0063   |          |            |                         |
|                                                        |                           |                  |                                                                                                                                                                 | 0.18                         | 0.012±0.0063    |          |            |                         |
|                                                        |                           |                  |                                                                                                                                                                 | 0.73                         | -0.0080±0.0063  |          |            |                         |
| <i>Rana pelusistris</i> Le Conte                       | Moore (1939)              | 4                | 15.5-25.7<br>10 (stages defined by Pollister, A. W., & Moore, J. A. Tables for the normal development of <i>Rana sylvatica</i> . Anat. Rec. 68, 489-496 (1937)) | 0.32                         | 0.0017±0.0063   | 0.552118 | 0.074      | 2.89E-04                |
|                                                        |                           |                  |                                                                                                                                                                 | 0.23                         | 0.0071±0.0063   |          | 0.227      | 5.00E-03                |
|                                                        |                           |                  |                                                                                                                                                                 | 0.18                         | 0.012±0.0063    |          | 0.495      | 1.36E-02                |
|                                                        |                           |                  |                                                                                                                                                                 | 0.73                         | -0.0080±0.0063  |          | 0.268      | 6.35E-03                |
|                                                        |                           |                  |                                                                                                                                                                 | 0.32                         | 0.0017±0.0063   |          |            |                         |
|                                                        |                           |                  |                                                                                                                                                                 | 0.23                         | 0.0071±0.0063   |          |            |                         |
|                                                        |                           |                  |                                                                                                                                                                 | 0.18                         | 0.012±0.0063    |          |            |                         |
|                                                        |                           |                  |                                                                                                                                                                 | 0.73                         | -0.0080±0.0063  |          |            |                         |

| Taxonomic group:<br>Species                                         | Reference             | Temp. (°C)<br>#1 | Stage<br>Range | Intercept<br>(angular<br>transformations)                                                                                                          | Slope±SE              | P        | Test Power<br>(% per °C) | Violation<br>(% per °C)  |                     |          |   |          |
|---------------------------------------------------------------------|-----------------------|------------------|----------------|----------------------------------------------------------------------------------------------------------------------------------------------------|-----------------------|----------|--------------------------|--------------------------|---------------------|----------|---|----------|
|                                                                     |                       |                  |                |                                                                                                                                                    |                       |          |                          |                          |                     |          |   |          |
| <i>Rana clamitans</i> Latreille                                     | Moore (1939)          | 3                | 15-25.3        | 19                                                                                                                                                 | 0.53 -0.0036±0.0063   | 0.946082 | 0.112                    | 1.27E-03                 |                     |          |   |          |
|                                                                     |                       |                  |                | 18 (stages defined by Pollister, A. W., & Moore, J. A. Tables for the normal development of <i>Rana sylvatica</i> . Anat. Rec. 68, 489-496 (1937)) | 0.78 0.0034±0.0027    |          | 0.057                    | 1.16E-03                 |                     |          |   |          |
|                                                                     |                       |                  |                | 19                                                                                                                                                 | 0.88 -0.0086±0.027    |          | 0.070                    | 7.44E-03                 |                     |          |   |          |
|                                                                     |                       |                  |                | stadium I                                                                                                                                          | 0.38 0.0074±0.0066    | 0.685976 | 0.347                    | 5.53E-03                 |                     |          |   |          |
|                                                                     |                       |                  |                | stadium II                                                                                                                                         | 0.30 0.00084±0.0066   |          | 0.064                    | 7.04E-05                 |                     |          |   |          |
|                                                                     |                       |                  |                | stadium III                                                                                                                                        | 0.27 0.0020±0.0066    |          | 0.090                    | 4.03E-04                 |                     |          |   |          |
|                                                                     |                       |                  |                | stadium IV                                                                                                                                         | 0.28 0.0054±0.0066    |          | 0.218                    | 2.90E-03                 |                     |          |   |          |
| <i>Rana fusca</i> Blyth                                             | Hertwig (1898)        | 4                | 6-20           | stadium V                                                                                                                                          | 0.46 -0.011±0.0066    |          | 0.627                    | 1.12E-02                 |                     |          |   |          |
|                                                                     |                       |                  |                | stadium VI                                                                                                                                         | 0.51 -0.0027±0.0066   |          | 0.109                    | 7.37E-04                 |                     |          |   |          |
|                                                                     |                       |                  |                | stadium VII                                                                                                                                        | 0.46 -0.0018±0.0066   |          | 0.085                    | 3.28E-04                 |                     |          |   |          |
|                                                                     |                       |                  |                | 16 blastomeres                                                                                                                                     | 0.22 0.00022±0.00067  | 0.217692 | 0.107                    | 4.68E-06                 |                     |          |   |          |
|                                                                     |                       |                  |                | early blastula 1                                                                                                                                   | 0.12 0.00028±0.00067  |          | 0.129                    | 7.95E-06                 |                     |          |   |          |
|                                                                     |                       |                  |                | early blastula 2                                                                                                                                   | 0.16 0.00053±0.00067  |          | 0.249                    | 2.83E-05                 |                     |          |   |          |
|                                                                     |                       |                  |                | middle blastula                                                                                                                                    | 0.27 -0.00043±0.00067 |          | 0.192                    | 1.83E-05                 |                     |          |   |          |
| Amphibia: Caudata<br><i>Salamandrella keyserlingi</i><br>(Dybowski) | Berman et al. (1987)  | 4                | 12-24          | beginning of gastrulation                                                                                                                          | 0.26 -0.00046±0.00067 |          | 0.207                    | 2.09E-05                 |                     |          |   |          |
|                                                                     |                       |                  |                | horseshoe-shaped blastoporus                                                                                                                       | 0.26 -0.00026±0.00067 |          | 0.120                    | 6.57E-06                 |                     |          |   |          |
|                                                                     |                       |                  |                | yolk plug                                                                                                                                          | 0.26 0.00052±0.00067  |          | 0.244                    | 2.74E-05                 |                     |          |   |          |
|                                                                     |                       |                  |                | beginning of neurulation                                                                                                                           | 0.29 -0.00037±0.00067 |          | 0.062                    | 1.36E-07                 |                     |          |   |          |
|                                                                     |                       |                  |                | approaching of neural plates                                                                                                                       | 0.26 0.00052±0.00067  |          | 0.244                    | 2.74E-05                 |                     |          |   |          |
|                                                                     |                       |                  |                | closure of neuroporus                                                                                                                              | 0.20 -0.0017±0.00067  |          | 0.453                    | 2.95E-04                 |                     |          |   |          |
|                                                                     |                       |                  |                | 5 cerebral lobes                                                                                                                                   | 0.11 0.0019±0.00067   |          | 0.632                    | 3.68E-04                 |                     |          |   |          |
|                                                                     |                       |                  |                | eye lobes                                                                                                                                          | 0.19 -0.0012±0.00067  |          | 0.898                    | 1.50E-04                 |                     |          |   |          |
|                                                                     |                       |                  |                | tail bud                                                                                                                                           | 0.16 -0.00032±0.00067 |          | 0.143                    | 1.00E-05                 |                     |          |   |          |
|                                                                     |                       |                  |                | gills visible                                                                                                                                      | 0.17 0.00060±0.00067  |          | 0.296                    | 3.66E-05                 |                     |          |   |          |
|                                                                     |                       |                  |                | beginning of eye pigmentation                                                                                                                      | 0.16 0.00088±0.00067  |          | 0.520                    | 7.72E-05                 |                     |          |   |          |
|                                                                     |                       |                  |                | gill basis divided                                                                                                                                 | 0.28 -0.00038±0.00067 |          | 0.170                    | 1.46E-05                 |                     |          |   |          |
|                                                                     |                       |                  |                | beginning of body pigmentation                                                                                                                     | 0.28 0.00036±0.00067  |          | 0.159                    | 1.28E-05                 |                     |          |   |          |
|                                                                     |                       |                  |                | 3 branchial archs                                                                                                                                  | 0.28 0.000043±0.00067 |          | 0.063                    | 1.84E-07                 |                     |          |   |          |
|                                                                     |                       |                  |                | balancers visible                                                                                                                                  | 0.34 -0.00057±0.00067 |          | 0.270                    | 3.20E-05                 |                     |          |   |          |
|                                                                     |                       |                  |                | Annelida:<br><i>Tubifex tubifex</i> Mueller                                                                                                        | Mesczerjakov (1975)   | 3        | 13-23                    | base of ventral ganglia  | 0.62 -0.0026±0.0016 | 0.007991 | - | 6.99E-04 |
|                                                                     |                       |                  |                |                                                                                                                                                    |                       |          |                          | 24-27 somits; gonoblasts | 0.04 0.0084±0.0016  |          |   | 7.12E-03 |
|                                                                     |                       |                  |                |                                                                                                                                                    |                       |          |                          | base of chaetal sacs     | 0.12 0.0025±0.0016  |          |   | 6.23E-04 |
|                                                                     |                       |                  |                |                                                                                                                                                    |                       |          |                          | first body coil          | 0.44 -0.0062±0.0016 |          |   | 3.89E-03 |
|                                                                     |                       |                  |                |                                                                                                                                                    |                       |          |                          | two body coils           | 0.42 -0.0022±0.0016 |          |   | 5.07E-04 |
| hatching                                                            | 0.60 0.0040±0.0016    |                  |                |                                                                                                                                                    |                       |          |                          | 1.64E-03                 |                     |          |   |          |
| first cleavage 1a                                                   | 0.01 0.0048±0.0030    | 0.556132         | 0.711          |                                                                                                                                                    |                       |          |                          | 2.27E-03                 |                     |          |   |          |
| first cleavage 1b                                                   | 0.07 -0.00027±0.0030  |                  | 0.070          |                                                                                                                                                    |                       |          |                          | 7.50E-06                 |                     |          |   |          |
| first cleavage 2b                                                   | 0.06 -0.00031±0.0030  |                  | 0.072          |                                                                                                                                                    |                       |          |                          | 9.44E-06                 |                     |          |   |          |
| 2 blastomeres                                                       | 0.11 -0.00048±0.0030  |                  | 0.081          |                                                                                                                                                    |                       |          |                          | 2.32E-05                 |                     |          |   |          |
| 4 blastomeres                                                       | 0.08 -0.000011±0.0030 |                  | 0.059          |                                                                                                                                                    |                       |          |                          | 1.15E-08                 |                     |          |   |          |
| 8 blastomeres                                                       | 0.07 0.0012±0.0030    |                  | 0.131          |                                                                                                                                                    |                       |          |                          | 1.53E-04                 |                     |          |   |          |
| 16 blastomeres                                                      | 0.09 -0.0024±0.0030   |                  | 0.253          |                                                                                                                                                    |                       |          |                          | 5.75E-04                 |                     |          |   |          |
| 32 blastomeres                                                      | 0.10 -0.00069±0.0030  |                  | 0.093          | 4.78E-05                                                                                                                                           |                       |          |                          |                          |                     |          |   |          |
| middle blastula 1                                                   | 0.22 -0.0010±0.0030   |                  | 0.117          | 1.10E-04                                                                                                                                           |                       |          |                          |                          |                     |          |   |          |
| middle blastula 2                                                   | 0.14 -0.000019±0.0030 |                  | 0.059          | 3.51E-08                                                                                                                                           |                       |          |                          |                          |                     |          |   |          |
| early gastrula 1                                                    | 0.24 -0.00099±0.0030  |                  | 0.112          | 9.76E-05                                                                                                                                           |                       |          |                          |                          |                     |          |   |          |
| Echinodermata:<br><i>Strongylocentrotus droebachiensis</i> Mueller  | Stephens (1972)       | 3                | 0-8            | first cleavage 1a                                                                                                                                  | 0.01 0.0048±0.0030    | 0.556132 | 0.711                    | 2.27E-03                 |                     |          |   |          |
|                                                                     |                       |                  |                | first cleavage 1b                                                                                                                                  | 0.07 -0.00027±0.0030  |          | 0.070                    | 7.50E-06                 |                     |          |   |          |
| first cleavage 2b                                                   | 0.06 -0.00031±0.0030  |                  | 0.072          | 9.44E-06                                                                                                                                           |                       |          |                          |                          |                     |          |   |          |
| 2 blastomeres                                                       | 0.11 -0.00048±0.0030  |                  | 0.081          | 2.32E-05                                                                                                                                           |                       |          |                          |                          |                     |          |   |          |
| 4 blastomeres                                                       | 0.08 -0.000011±0.0030 |                  | 0.059          | 1.15E-08                                                                                                                                           |                       |          |                          |                          |                     |          |   |          |
| 8 blastomeres                                                       | 0.07 0.0012±0.0030    |                  | 0.131          | 1.53E-04                                                                                                                                           |                       |          |                          |                          |                     |          |   |          |
| 16 blastomeres                                                      | 0.09 -0.0024±0.0030   |                  | 0.253          | 5.75E-04                                                                                                                                           |                       |          |                          |                          |                     |          |   |          |
| 32 blastomeres                                                      | 0.10 -0.00069±0.0030  |                  | 0.093          | 4.78E-05                                                                                                                                           |                       |          |                          |                          |                     |          |   |          |
| middle blastula 1                                                   | 0.22 -0.0010±0.0030   |                  | 0.117          | 1.10E-04                                                                                                                                           |                       |          |                          |                          |                     |          |   |          |
| middle blastula 2                                                   | 0.14 -0.000019±0.0030 |                  | 0.059          | 3.51E-08                                                                                                                                           |                       |          |                          |                          |                     |          |   |          |
| early gastrula 1                                                    | 0.24 -0.00099±0.0030  |                  | 0.112          | 9.76E-05                                                                                                                                           |                       |          |                          |                          |                     |          |   |          |

| Taxonomic group:<br>Species | Reference | Temp. (°C)<br>#1 | Range | Stage            | Intercept<br>(angular<br>transformations) | Slope±SE       | P | Test Power | Violation<br>(% per °C) |
|-----------------------------|-----------|------------------|-------|------------------|-------------------------------------------|----------------|---|------------|-------------------------|
|                             |           |                  |       | middle. gastrula | 0.25                                      | -0.0039±0.0030 |   | 0.507      | 1.50E-03                |
|                             |           |                  |       | late gastrula    | 0.19                                      | 0.0027±0.0030  |   | 0.297      | 7.33E-04                |
|                             |           |                  |       | prism            | 0.26                                      | 0.00065±0.0030 |   | 0.090      | 4.24E-05                |
|                             |           |                  |       | early pluteus    | 0.35                                      | -0.0071±0.0030 |   | 0.309      | 5.04E-03                |
|                             |           |                  |       | middle pluteus 1 | 0.37                                      | 0.0058±0.0030  |   | 0.965      | 3.31E-03                |
|                             |           |                  |       | middle pluteus 2 | 0.70                                      | 0.0020±0.0030  |   | 0.204      | 3.99E-04                |
